# Supplementary material for: Comparative Genomics of Fusarium oxysporum f. sp. albedinis Reveals the Effector Repertoire and Molecular Arsenal for Date Palm Infection.
Source: Research Square preprint supplement (doi:10.21203/rs.3.rs-8388991/v1), 2026-01-14
Supplement: Supplementary file 1 [file 0cc43c9e72be89b4cb492196.xlsx]

## Sheet: all_sIX-gene
# ER20
Job Title:g11576.t1
Program: TBLASTN
Database: core_nt Core nucleotide BLAST database
Query #1: g11576.t1 Query ID: lcl|Query_3187965 Length: 397
Sequences producing significant alignments:
Scientific Common Max Total Query E Per. Acc.
Description Name Name Taxid Score Score cover Value Ident Len Accession
Fusarium oxysporum f. sp. lycopersici 4287 Secreted in xylem 1 Fusarium oxy... NA 426428 333 520 99% 2e-114 91.53 630 XM_018382026.1
Alignments:
>Fusarium oxysporum f. sp. lycopersici 4287 Secreted in xylem 1 (FOXG_04132), partial mRNA
Sequence ID: XM_018382026.1 Length: 630
Range 1: 61 to 627
Score:333 bits(853), Expect:2e-114,
Method:Compositional matrix adjust.,
Identities:185/189(98%), Positives:186/189(98%), Gaps:0/189(0%)
Query 209 DAPIEGYGVVVPEWEVEVTSGSTTVLEGTIEEIHEELLQLNPNWDEEYMSNFTQAAADTE 268
DA IEGYGVVVPEWEVEVTSGSTTVLEGTIEEIHEELLQLNPNWDEEYMSNFTQAAADTE
Sbjct 61 DAHIEGYGVVVPEWEVEVTSGSTTVLEGTIEEIHEELLQLNPNWDEEYMSNFTQAAADTE 240
Query 269 KRDSDKHLFGRTNFNGAKYTCRGRWPECHPAPIVRGVEYLRYVQgnpkngpgpgncgRVS 328
KRDSDKHLFGRTNFNGAK+TCRGRWPECHPAPIVRGVEYLRYVQG PKNGPGPGNCGRVS
Sbjct 241 KRDSDKHLFGRTNFNGAKHTCRGRWPECHPAPIVRGVEYLRYVQGKPKNGPGPGNCGRVS 420
Query 329 CSNNAAIWWCNDNASSKTLNGFGSIADGAEYINNKCTRWGWQNGGYRSFVSGQVFHSTKW 388
CSNNAAIWWCNDNASSKTLNGFGSIADGAEYI NKCTRWGWQNGGYRSFVSGQVFHSTKW
Sbjct 421 CSNNAAIWWCNDNASSKTLNGFGSIADGAEYITNKCTRWGWQNGGYRSFVSGQVFHSTKW 600
Query 389 NVIVRKDKC 397
NVIVRKDKC
Sbjct 601 NVIVRKDKC 627
Job Title:g14359.t1
Program: TBLASTN
Database: core_nt Core nucleotide BLAST database
Query #1: g14359.t1 Query ID: lcl|Query_3978817 Length: 181
Sequences producing significant alignments:
Scientific Common Max Total Query E Per. Acc.
Description Name Name Taxid Score Score cover Value Ident Len Accession
Fusarium oxysporum f. sp. lycopersici 4287 Secreted in xylem 6 Fusarium oxy... NA 426428 334 334 100% 1e-118 90.61 645 XM_018387856.1
Alignments:
>Fusarium oxysporum f. sp. lycopersici 4287 Secreted in xylem 6 (FOXG_08829), partial mRNA
Sequence ID: XM_018387856.1 Length: 645
Range 1: 1 to 543
Score:334 bits(857), Expect:1e-118,
Method:Compositional matrix adjust.,
Identities:179/181(99%), Positives:179/181(98%), Gaps:0/181(0%)
Query 1 MKCTPTafallaaaaagvqaaNIQLVGSVLNSAAKEPFEKSKTLVYAGGKTKRDAPKVYE 60
MKCT AFALLAAAAAGVQAANIQLVGSVLNSAAKEPFEKSKTLVYAGGKTKRDAPKVYE
Sbjct 1 MKCTSAAFALLAAAAAGVQAANIQLVGSVLNSAAKEPFEKSKTLVYAGGKTKRDAPKVYE 180
Query 61 PDPNRDYNLEDGYIFVLQCTTVGFRPECISFGSEPGKCVSYFDFDPKKGDDPTSISDAFN 120
PDPNRDYNLEDGYIFVLQCTTVGFRPECISFGSEPGKCVSYFDFDPKKGDDPTSISDAFN
Sbjct 181 PDPNRDYNLEDGYIFVLQCTTVGFRPECISFGSEPGKCVSYFDFDPKKGDDPTSISDAFN 360
Query 121 HNVTSISTNTGGVCQFYHYTGCDDKLDDRGLSTSYNYNLNVSLPEDSRTVEYFRNITSWR 180
HNVTSISTNTGGVCQFYHYTGCDDKLDDRGLSTSYNYNLNVSLPEDSRTVEYFRNITSWR
Sbjct 361 HNVTSISTNTGGVCQFYHYTGCDDKLDDRGLSTSYNYNLNVSLPEDSRTVEYFRNITSWR 540
Query 181 C 181
C
Sbjct 541 C 543
# FOA133
Job Title:g11032.t1
Program: TBLASTN
Database: core_nt Core nucleotide BLAST database
Query #1: g11032.t1 Query ID: lcl|Query_5084133 Length: 397
Sequences producing significant alignments:
Scientific Common Max Total Query E Per. Acc.
Description Name Name Taxid Score Score cover Value Ident Len Accession
Fusarium oxysporum f. sp. lycopersici 4287 Secreted in xylem 1 Fusarium oxy... NA 426428 333 520 99% 2e-114 91.53 630 XM_018382026.1
Alignments:
>Fusarium oxysporum f. sp. lycopersici 4287 Secreted in xylem 1 (FOXG_04132), partial mRNA
Sequence ID: XM_018382026.1 Length: 630
Range 1: 61 to 627
Score:333 bits(853), Expect:2e-114,
Method:Compositional matrix adjust.,
Identities:185/189(98%), Positives:186/189(98%), Gaps:0/189(0%)
Query 209 DAPIEGYGVVVPEWEVEVTSGSTTVLEGTIEEIHEELLQLNPNWDEEYMSNFTQAAADTE 268
DA IEGYGVVVPEWEVEVTSGSTTVLEGTIEEIHEELLQLNPNWDEEYMSNFTQAAADTE
Sbjct 61 DAHIEGYGVVVPEWEVEVTSGSTTVLEGTIEEIHEELLQLNPNWDEEYMSNFTQAAADTE 240
Query 269 KRDSDKHLFGRTNFNGAKYTCRGRWPECHPAPIVRGVEYLRYVQgnpkngpgpgncgRVS 328
KRDSDKHLFGRTNFNGAK+TCRGRWPECHPAPIVRGVEYLRYVQG PKNGPGPGNCGRVS
Sbjct 241 KRDSDKHLFGRTNFNGAKHTCRGRWPECHPAPIVRGVEYLRYVQGKPKNGPGPGNCGRVS 420
Query 329 CSNNAAIWWCNDNASSKTLNGFGSIADGAEYINNKCTRWGWQNGGYRSFVSGQVFHSTKW 388
CSNNAAIWWCNDNASSKTLNGFGSIADGAEYI NKCTRWGWQNGGYRSFVSGQVFHSTKW
Sbjct 421 CSNNAAIWWCNDNASSKTLNGFGSIADGAEYITNKCTRWGWQNGGYRSFVSGQVFHSTKW 600
Query 389 NVIVRKDKC 397
NVIVRKDKC
Sbjct 601 NVIVRKDKC 627
Job Title:g14198.t1
Program: TBLASTN
Database: core_nt Core nucleotide BLAST database
Query #1: g14198.t1 Query ID: lcl|Query_5349717 Length: 181
Sequences producing significant alignments:
Scientific Common Max Total Query E Per. Acc.
Description Name Name Taxid Score Score cover Value Ident Len Accession
Fusarium oxysporum f. sp. lycopersici 4287 Secreted in xylem 6 Fusarium oxy... NA 426428 334 334 100% 1e-118 90.61 645 XM_018387856.1
Alignments:
>Fusarium oxysporum f. sp. lycopersici 4287 Secreted in xylem 6 (FOXG_08829), partial mRNA
Sequence ID: XM_018387856.1 Length: 645
Range 1: 1 to 543
Score:334 bits(857), Expect:1e-118,
Method:Compositional matrix adjust.,
Identities:179/181(99%), Positives:179/181(98%), Gaps:0/181(0%)
Query 1 MKCTPTafallaaaaagvqaaNIQLVGSVLNSAAKEPFEKSKTLVYAGGKTKRDAPKVYE 60
MKCT AFALLAAAAAGVQAANIQLVGSVLNSAAKEPFEKSKTLVYAGGKTKRDAPKVYE
Sbjct 1 MKCTSAAFALLAAAAAGVQAANIQLVGSVLNSAAKEPFEKSKTLVYAGGKTKRDAPKVYE 180
Query 61 PDPNRDYNLEDGYIFVLQCTTVGFRPECISFGSEPGKCVSYFDFDPKKGDDPTSISDAFN 120
PDPNRDYNLEDGYIFVLQCTTVGFRPECISFGSEPGKCVSYFDFDPKKGDDPTSISDAFN
Sbjct 181 PDPNRDYNLEDGYIFVLQCTTVGFRPECISFGSEPGKCVSYFDFDPKKGDDPTSISDAFN 360
Query 121 HNVTSISTNTGGVCQFYHYTGCDDKLDDRGLSTSYNYNLNVSLPEDSRTVEYFRNITSWR 180
HNVTSISTNTGGVCQFYHYTGCDDKLDDRGLSTSYNYNLNVSLPEDSRTVEYFRNITSWR
Sbjct 361 HNVTSISTNTGGVCQFYHYTGCDDKLDDRGLSTSYNYNLNVSLPEDSRTVEYFRNITSWR 540
Query 181 C 181
C
Sbjct 541 C 543
# ER10
Job Title:g14352.t1
Program: TBLASTN
Database: core_nt Core nucleotide BLAST database
Query #1: g14352.t1 Query ID: lcl|Query_5977049 Length: 181
Sequences producing significant alignments:
Scientific Common Max Total Query E Per. Acc.
Description Name Name Taxid Score Score cover Value Ident Len Accession
Fusarium oxysporum f. sp. lycopersici 4287 Secreted in xylem 6 Fusarium oxy... NA 426428 334 334 100% 1e-118 90.61 645 XM_018387856.1
Alignments:
>Fusarium oxysporum f. sp. lycopersici 4287 Secreted in xylem 6 (FOXG_08829), partial mRNA
Sequence ID: XM_018387856.1 Length: 645
Range 1: 1 to 543
Score:334 bits(857), Expect:1e-118,
Method:Compositional matrix adjust.,
Identities:179/181(99%), Positives:179/181(98%), Gaps:0/181(0%)
Query 1 MKCTPTafallaaaaagvqaaNIQLVGSVLNSAAKEPFEKSKTLVYAGGKTKRDAPKVYE 60
MKCT AFALLAAAAAGVQAANIQLVGSVLNSAAKEPFEKSKTLVYAGGKTKRDAPKVYE
Sbjct 1 MKCTSAAFALLAAAAAGVQAANIQLVGSVLNSAAKEPFEKSKTLVYAGGKTKRDAPKVYE 180
Query 61 PDPNRDYNLEDGYIFVLQCTTVGFRPECISFGSEPGKCVSYFDFDPKKGDDPTSISDAFN 120
PDPNRDYNLEDGYIFVLQCTTVGFRPECISFGSEPGKCVSYFDFDPKKGDDPTSISDAFN
Sbjct 181 PDPNRDYNLEDGYIFVLQCTTVGFRPECISFGSEPGKCVSYFDFDPKKGDDPTSISDAFN 360
Query 121 HNVTSISTNTGGVCQFYHYTGCDDKLDDRGLSTSYNYNLNVSLPEDSRTVEYFRNITSWR 180
HNVTSISTNTGGVCQFYHYTGCDDKLDDRGLSTSYNYNLNVSLPEDSRTVEYFRNITSWR
Sbjct 361 HNVTSISTNTGGVCQFYHYTGCDDKLDDRGLSTSYNYNLNVSLPEDSRTVEYFRNITSWR 540
Query 181 C 181
C
Sbjct 541 C 543
Job Title:g11858.t1
Program: TBLASTN
Database: core_nt Core nucleotide BLAST database
Query #1: g11858.t1 Query ID: lcl|Query_6220131 Length: 397
Sequences producing significant alignments:
Scientific Common Max Total Query E Per. Acc.
Description Name Name Taxid Score Score cover Value Ident Len Accession
Fusarium oxysporum f. sp. lycopersici 4287 Secreted in xylem 1 Fusarium oxy... NA 426428 333 520 99% 2e-114 91.53 630 XM_018382026.1
Alignments:
>Fusarium oxysporum f. sp. lycopersici 4287 Secreted in xylem 1 (FOXG_04132), partial mRNA
Sequence ID: XM_018382026.1 Length: 630
Range 1: 61 to 627
Score:333 bits(853), Expect:2e-114,
Method:Compositional matrix adjust.,
Identities:185/189(98%), Positives:186/189(98%), Gaps:0/189(0%)
Query 209 DAPIEGYGVVVPEWEVEVTSGSTTVLEGTIEEIHEELLQLNPNWDEEYMSNFTQAAADTE 268
DA IEGYGVVVPEWEVEVTSGSTTVLEGTIEEIHEELLQLNPNWDEEYMSNFTQAAADTE
Sbjct 61 DAHIEGYGVVVPEWEVEVTSGSTTVLEGTIEEIHEELLQLNPNWDEEYMSNFTQAAADTE 240
Query 269 KRDSDKHLFGRTNFNGAKYTCRGRWPECHPAPIVRGVEYLRYVQgnpkngpgpgncgRVS 328
KRDSDKHLFGRTNFNGAK+TCRGRWPECHPAPIVRGVEYLRYVQG PKNGPGPGNCGRVS
Sbjct 241 KRDSDKHLFGRTNFNGAKHTCRGRWPECHPAPIVRGVEYLRYVQGKPKNGPGPGNCGRVS 420
Query 329 CSNNAAIWWCNDNASSKTLNGFGSIADGAEYINNKCTRWGWQNGGYRSFVSGQVFHSTKW 388
CSNNAAIWWCNDNASSKTLNGFGSIADGAEYI NKCTRWGWQNGGYRSFVSGQVFHSTKW
Sbjct 421 CSNNAAIWWCNDNASSKTLNGFGSIADGAEYITNKCTRWGWQNGGYRSFVSGQVFHSTKW 600
Query 389 NVIVRKDKC 397
NVIVRKDKC
Sbjct 601 NVIVRKDKC 627
# ZG10
Job Title:g14317.t1
Program: TBLASTN
Database: core_nt Core nucleotide BLAST database
Query #1: g14317.t1 Query ID: lcl|Query_7782139 Length: 181
Sequences producing significant alignments:
Scientific Common Max Total Query E Per. Acc.
Description Name Name Taxid Score Score cover Value Ident Len Accession
Fusarium oxysporum f. sp. lycopersici 4287 Secreted in xylem 6 Fusarium oxy... NA 426428 334 334 100% 1e-118 90.61 645 XM_018387856.1
Alignments:
>Fusarium oxysporum f. sp. lycopersici 4287 Secreted in xylem 6 (FOXG_08829), partial mRNA
Sequence ID: XM_018387856.1 Length: 645
Range 1: 1 to 543
Score:334 bits(857), Expect:1e-118,
Method:Compositional matrix adjust.,
Identities:179/181(99%), Positives:179/181(98%), Gaps:0/181(0%)
Query 1 MKCTPTafallaaaaagvqaaNIQLVGSVLNSAAKEPFEKSKTLVYAGGKTKRDAPKVYE 60
MKCT AFALLAAAAAGVQAANIQLVGSVLNSAAKEPFEKSKTLVYAGGKTKRDAPKVYE
Sbjct 1 MKCTSAAFALLAAAAAGVQAANIQLVGSVLNSAAKEPFEKSKTLVYAGGKTKRDAPKVYE 180
Query 61 PDPNRDYNLEDGYIFVLQCTTVGFRPECISFGSEPGKCVSYFDFDPKKGDDPTSISDAFN 120
PDPNRDYNLEDGYIFVLQCTTVGFRPECISFGSEPGKCVSYFDFDPKKGDDPTSISDAFN
Sbjct 181 PDPNRDYNLEDGYIFVLQCTTVGFRPECISFGSEPGKCVSYFDFDPKKGDDPTSISDAFN 360
Query 121 HNVTSISTNTGGVCQFYHYTGCDDKLDDRGLSTSYNYNLNVSLPEDSRTVEYFRNITSWR 180
HNVTSISTNTGGVCQFYHYTGCDDKLDDRGLSTSYNYNLNVSLPEDSRTVEYFRNITSWR
Sbjct 361 HNVTSISTNTGGVCQFYHYTGCDDKLDDRGLSTSYNYNLNVSLPEDSRTVEYFRNITSWR 540
Query 181 C 181
C
Sbjct 541 C 543
Job Title:g11870.t1
Program: TBLASTN
Database: core_nt Core nucleotide BLAST database
Query #1: g11870.t1 Query ID: lcl|Query_7571389 Length: 397
Sequences producing significant alignments:
Scientific Common Max Total Query E Per. Acc.
Description Name Name Taxid Score Score cover Value Ident Len Accession
Fusarium oxysporum f. sp. lycopersici 4287 Secreted in xylem 1 Fusarium oxy... NA 426428 333 520 99% 2e-114 91.53 630 XM_018382026.1
Alignments:
>Fusarium oxysporum f. sp. lycopersici 4287 Secreted in xylem 1 (FOXG_04132), partial mRNA
Sequence ID: XM_018382026.1 Length: 630
Range 1: 61 to 627
Score:333 bits(853), Expect:2e-114,
Method:Compositional matrix adjust.,
Identities:185/189(98%), Positives:186/189(98%), Gaps:0/189(0%)
Query 209 DAPIEGYGVVVPEWEVEVTSGSTTVLEGTIEEIHEELLQLNPNWDEEYMSNFTQAAADTE 268
DA IEGYGVVVPEWEVEVTSGSTTVLEGTIEEIHEELLQLNPNWDEEYMSNFTQAAADTE
Sbjct 61 DAHIEGYGVVVPEWEVEVTSGSTTVLEGTIEEIHEELLQLNPNWDEEYMSNFTQAAADTE 240
Query 269 KRDSDKHLFGRTNFNGAKYTCRGRWPECHPAPIVRGVEYLRYVQgnpkngpgpgncgRVS 328
KRDSDKHLFGRTNFNGAK+TCRGRWPECHPAPIVRGVEYLRYVQG PKNGPGPGNCGRVS
Sbjct 241 KRDSDKHLFGRTNFNGAKHTCRGRWPECHPAPIVRGVEYLRYVQGKPKNGPGPGNCGRVS 420
Query 329 CSNNAAIWWCNDNASSKTLNGFGSIADGAEYINNKCTRWGWQNGGYRSFVSGQVFHSTKW 388
CSNNAAIWWCNDNASSKTLNGFGSIADGAEYI NKCTRWGWQNGGYRSFVSGQVFHSTKW
Sbjct 421 CSNNAAIWWCNDNASSKTLNGFGSIADGAEYITNKCTRWGWQNGGYRSFVSGQVFHSTKW 600
Query 389 NVIVRKDKC 397
NVIVRKDKC
Sbjct 601 NVIVRKDKC 627
