# Supplementary material for: Comparative Genomics of Fusarium oxysporum f. sp. albedinis Reveals the Effector Repertoire and Molecular Arsenal for Date Palm Infection.
Source: Research Square preprint supplement (doi:10.21203/rs.3.rs-8388991/v1), 2026-01-14
Supplement: Supplementary file 2 [file 541d5fc3f8937d61fed0058d.docx]

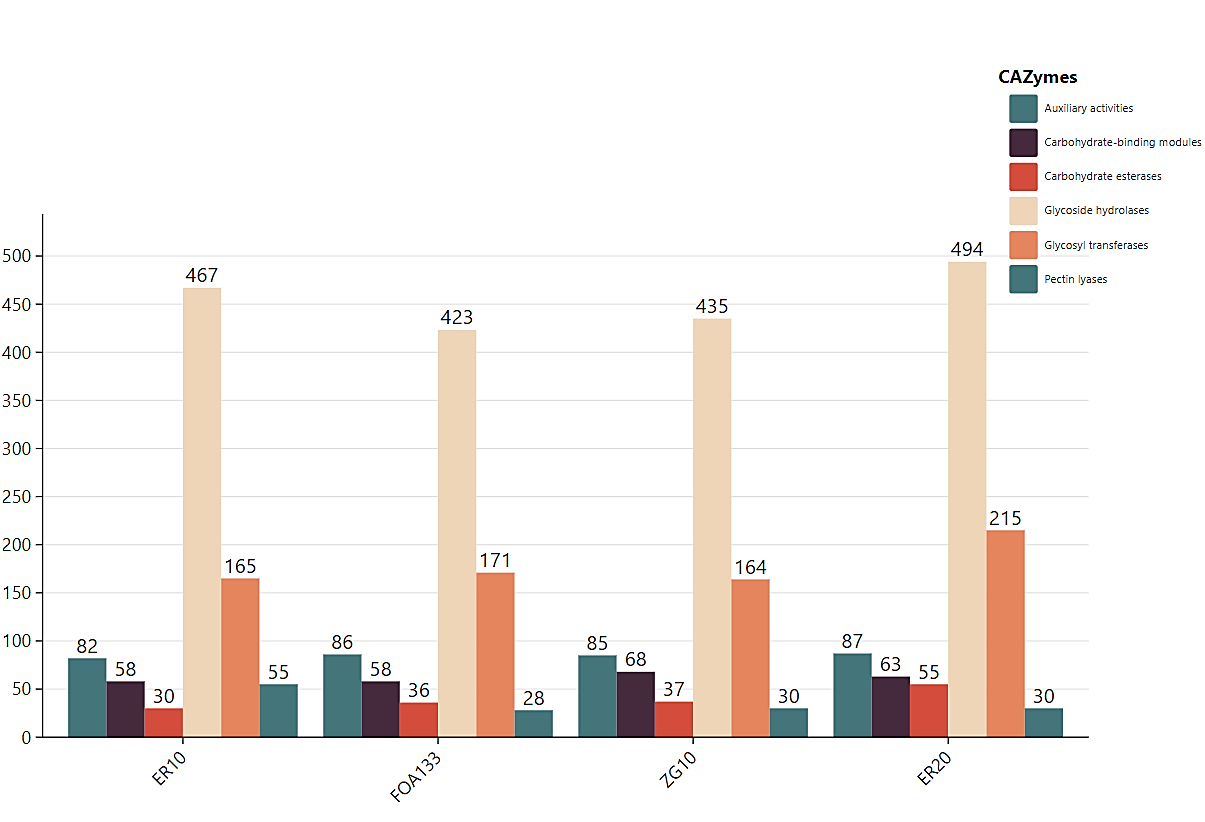


Figure : Repartition of Carbohydrate Active enZymes (CAZymes) repertoire of the Foa strains. Bar chart depicting the total number of carbohydrate-active enzymes (CAZymes) in each isolate. From left to right, each colour represents a CAZyme class. Green represents auxiliary activities; black represents carbohydrate band modules; red represents carbohydrate esterases; beige represents glycoside hydrolases; orange represents glycosyltransferases; and green represents pectin lyases.
