# Supplementary material for: Comparative Genomics of Fusarium oxysporum f. sp. albedinis Reveals the Effector Repertoire and Molecular Arsenal for Date Palm Infection.
Source: Research Square preprint supplement (doi:10.21203/rs.3.rs-8388991/v1), 2026-01-14
Supplement: Supplementary file 3 [file a9438f4e10a5905d320be187.docx]

**Table 1:** **Genome Assembly report of ER10**

| Assembly | scaffolds |
| --- | --- |
| # contigs (>= 0 bp) | 18843 |
| # contigs (>= 1000 bp) | 2715 |
| # contigs (>= 5000 bp) | 1139 |
| # contigs (>= 10000 bp) | 719 |
| # contigs (>= 25000 bp) | 378 |
| # contigs (>= 50000 bp) | 242 |
| Total length (>= 0 bp) | 59020947 |
| Total length (>= 1000 bp) | 55105464 |
| Total length (>= 5000 bp) | 51387130 |
| Total length (>= 10000 bp) | 48478166 |
| Total length (>= 25000 bp) | 43176453 |
| Total length (>= 50000 bp) | 38372534 |
| # contigs | 4005 |
| Largest contig | 1206212 |
| Total length | 55972324 |
| GC (%) | 47.45 |
| N50 | 125225 |
| N90 | 6353 |
| auN | 193950.6 |
| L50 | 108 |
| L90 | 961 |
| # N's per 100 kbp | 11.43 |

**Table 2:** **Genome Assembly report of Foa133**

| Assembly | scaffolds |
| --- | --- |
| # contigs (>= 0 bp) | 18161 |
| # contigs (>= 1000 bp) | 2636 |
| # contigs (>= 5000 bp) | 1099 |
| # contigs (>= 10000 bp) | 658 |
| # contigs (>= 25000 bp) | 357 |
| # contigs (>= 50000 bp) | 234 |
| Total length (>= 0 bp) | 58815883 |
| Total length (>= 1000 bp) | 55014153 |
| Total length (>= 5000 bp) | 51494089 |
| Total length (>= 10000 bp) | 48336564 |
| Total length (>= 25000 bp) | 43736903 |
| Total length (>= 50000 bp) | 39350203 |
| # contigs | 3949 |
| Largest contig | 899468 |
| Total length | 55911599 |
| GC (%) | 47.42 |
| N50 | 131578 |
| N90 | 6737 |
| auN | 215453.2 |
| L50 | 99 |
| L90 | 899 |
| # N's per 100 kbp | 15.95 |

**Table 3:** **Genome Assembly report of ZG10**

| Assembly | scaffolds |
| --- | --- |
| # contigs (>= 0 bp) | 25176 |
| # contigs (>= 1000 bp) | 2978 |
| # contigs (>= 5000 bp) | 1224 |
| # contigs (>= 10000 bp) | 726 |
| # contigs (>= 25000 bp) | 381 |
| # contigs (>= 50000 bp) | 249 |
| Total length (>= 0 bp) | 61238148 |
| Total length (>= 1000 bp) | 55536929 |
| Total length (>= 5000 bp) | 51504393 |
| Total length (>= 10000 bp) | 47998193 |
| Total length (>= 25000 bp) | 42568755 |
| Total length (>= 50000 bp) | 37866646 |
| # contigs | 4615 |
| Largest contig | 1041656 |
| Total length | 56637595 |
| GC (%) | 47.46 |
| N50 | 103178 |
| N90 | 5618 |
| auN | 200256.4 |
| L50 | 117 |
| L90 | 1124 |
| # N's per 100 kbp | 10.21 |

**Table 4:** **Genome Assembly report of ER20**

| Assembly | scaffolds |
| --- | --- |
| # contigs (>= 0 bp) | 23866 |
| # contigs (>= 1000 bp) | 2783 |
| # contigs (>= 5000 bp) | 1160 |
| # contigs (>= 10000 bp) | 711 |
| # contigs (>= 25000 bp) | 364 |
| # contigs (>= 50000 bp) | 241 |
| Total length (>= 0 bp) | 60623757 |
| Total length (>= 1000 bp) | 55479377 |
| Total length (>= 5000 bp) | 51642164 |
| Total length (>= 10000 bp) | 48465031 |
| Total length (>= 25000 bp) | 43167624 |
| Total length (>= 50000 bp) | 38740554 |
| # contigs | 4412 |
| Largest contig | 1042163 |
| Total length | 56564080 |
| GC (%) | 47.5 |
| N50 | 125058 |
| N90 | 6050 |
| auN | 216701.7 |
| L50 | 105 |
| L90 | 1027 |
| # N's per 100 kbp | 11.54 |


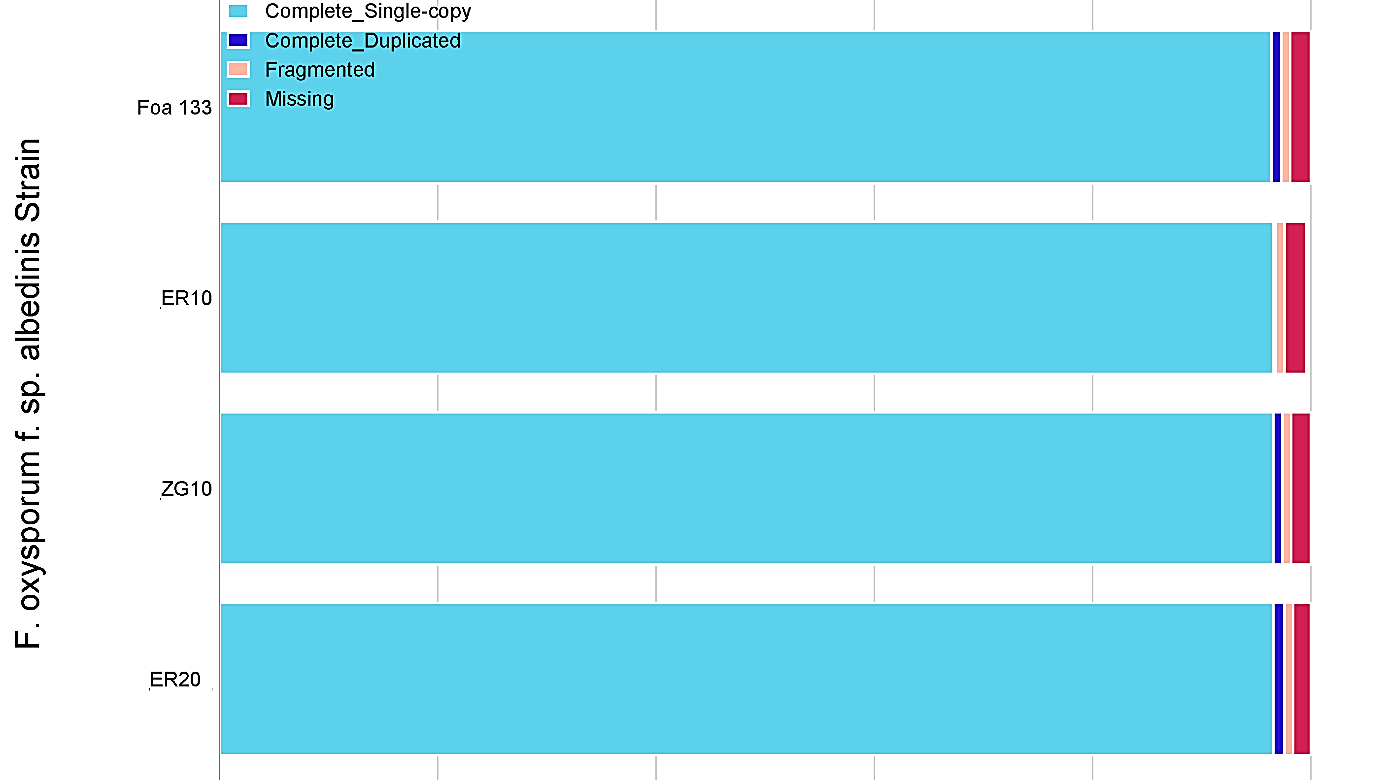


Figure : Benchmarking Universal Single-Copy Orthologs (BUSCO) results
